# Supplementary material for: A cleavable linker strategy for optimising enolate alkylation reactions of a polymer-supported Evans' oxazolidin-2-one
Source: Royal Society of Chemistry journal article supplement (doi:10.1039/b713966g), 2007-11-29
Supplement: b713966g.pdf [file b713966g.pdf]

# A cleavable linker strategy for optimizing the enolate alkylation reactions of a polymer-supported Evans' oxazolidin-2-one

Rachel Green,<sup>a</sup> Andrew T. Merritt,<sup>b</sup> and Steven D. Bull.<sup>a\*</sup>

<sup>a</sup>Department of Chemistry, University of Bath, Claverton Down, Bath, BA2 7AY, UK;

E-mail: s.d.bull@bath.ac.uk

<sup>b</sup> GlaxoSmithKline Research and Development, Medicines Research Centre, Gunnels Wood Road, Stevenage, Hertfordshire SG1 2NY, UK.

## General procedure for carrying out TFA cleavage of 2-chlorotrityl polymer-supported oxazolidin-2-ones

20 mg of resin was treated with a solution of CH<sub>2</sub>Cl<sub>2</sub>/trifluoroacetic acid/triisopropylsilane (94 : 1 : 5) (4 mL) and the reaction swirled on an orbital shaker at room temperature for 30 min. The resin was then filtered off and washed sequentially with CH<sub>2</sub>Cl<sub>2</sub> (5mL), THF (5mL) and MeOH (5mL). The organic solvent and washings were then combined together and solvent removed *in vacuo* to afford cleavage products whose mass was determined via weighing, and composition analysed *via* HPLC and/or <sup>1</sup>H NMR spectroscopy.

## 2-Cl-Trt-supported *N*-H-oxazolidin-2-one (S)-5

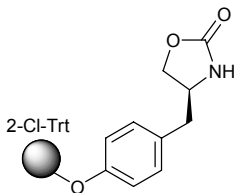

A solution of *N*H-oxazolidin-2-one (S)-4 (695 mg, 3.6 mmol) in CH<sub>2</sub>Cl<sub>2</sub>/THF/DMF (50: 45: 5) was added to a suspension of preswollen 2-chlorotrityl chloride resin (1.00g, 1.20 mmol) in CH<sub>2</sub>Cl<sub>2</sub>/THF (1:1) (80 mL). Diisopropylethylamine (2.090 mL, 12.0 mmol) was then added and the reaction heated at 60 °C for 18 hours, after which time the reaction was cooled to room temperature and the resin removed *via* filtration. The resin was washed consecutively with CH<sub>2</sub>Cl<sub>2</sub> (50mL), THF (50mL) and CH<sub>2</sub>Cl<sub>2</sub>/MeOH (50mL), and the resin dried thoroughly in a vacuum oven at 40 °C. The loading of resin (S)-5 (IR,  $\nu(\text{C}=\text{O}) = 1752\text{cm}^{-1}$ ) was determined to be 1.16 mmolg<sup>-1</sup> (97 %) *via* TFA cleavage to afford OH-NH-oxazolidin-2-one (S)-4.

## (S)-4-(4-Hydroxy-benzyl)-oxazolidin-2-one 4

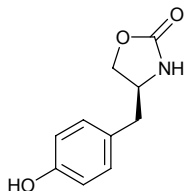

m.p. 179-181 °C (Lit.<sup>1</sup> m.p. 178-179 °C);  $[\alpha]_D^{21} + 12.1$  (*c* 0.65, EtOH) (Lit.<sup>1</sup>  $[\alpha]_D^{25} + 11.8$  (*c* 0.5, EtOH)); <sup>1</sup>H NMR (d<sub>4</sub>-MeOD, 300 MHz): δ 2.67 (2H, m, CH<sub>A</sub>H<sub>B</sub>Ar), 4.01 (2H, m, CH<sub>A</sub>H<sub>B</sub>O, CHN), 4.27 (1H, m, CH<sub>A</sub>H<sub>B</sub>O), 6.64 (2H, app. d, *J* 8.5 Hz, *o*-OArH), 6.95 (2H, app. d, *J* 8.5 Hz, *m*-OArH); <sup>13</sup>C NMR (d<sub>4</sub>-MeOH, 75.5 MHz): δ 41.4 (CH<sub>2</sub>), 55.6 (CH), 70.8 (CH<sub>2</sub>), 116.8 (CH), 128.6 (CH), 130.9 (C), 157.9 (C), 162.7 (C=O); IR (KBr)  $\nu_{\max}$  (cm<sup>-1</sup>): 3331 (broad O-H), 3140 (broad N-H), 1731 (C=O); MS (CI<sup>+</sup>) *m/z* (%) 211 (100) [M+NH<sub>4</sub><sup>+</sup>]; HRMS (ES<sup>+</sup>) for C<sub>10</sub>H<sub>11</sub>NO<sub>3</sub> [M+NH<sub>4</sub>]<sup>+</sup> Calc. 211.1077, Found 211.1079.

## 2-Cl-Trt-supported *N*-propionyl-oxazolidin-2-one (*S*)-6a

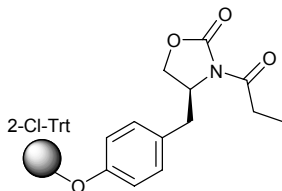

Lithium chloride (233 mg, 5.5 mmol), triethylamine (0.767 mL, 5.5 mmol) and propionic anhydride (1.10 mL, 5.5 mmol) were added to a suspension of preswollen polymer (*S*)-5 (1.00g, 1.10 mmol) in THF (100 mL) and the reaction mixture refluxed for 16 hours. The reaction was cooled to room temperature, the resin removed *via* filtration and washed thoroughly with CH<sub>2</sub>Cl<sub>2</sub> (10 mL), THF (10 mL), CH<sub>2</sub>Cl<sub>2</sub> / MeOH (10 mL) and dried in a vacuum oven at 40 °C. The loading of polymer (*S*)-6a (IR,  $\nu$ (C=O) = 1780, 1700 cm<sup>-1</sup>) was determined to be 1.05 mmol/g<sup>-1</sup> using TFA cleavage to afford (*S*)-*N*-propionyl-4-(4-hydroxybenzyl)-oxazolidin-2-one.

## (*S*)-*N*-propionyl-4-(4-hydroxybenzyl)-oxazolidin-2-one

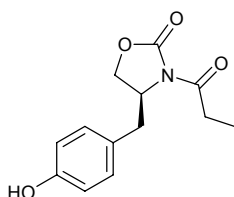

m. p. 135–136 °C;  $[\alpha]_D^{21} + 43$  (*c* 0.40, CHCl<sub>3</sub>); <sup>1</sup>H NMR (CDCl<sub>3</sub>, 300 MHz): δ 1.14 (3H, t, *J* 7.0 Hz, CH<sub>3</sub>), 2.66 (1H, dd, *J* 13.5, 9.5 Hz, CH<sub>A</sub>H<sub>B</sub>Ar), 2.89 (2H, m, CH<sub>2</sub>CH<sub>3</sub>), 3.13 (1H, dd, *J* 13.5, 3.5 Hz, CH<sub>A</sub>H<sub>B</sub>Ar), 4.12 (2H, m, CH<sub>A</sub>H<sub>B</sub>O), 4.55 (1H, m, CHN), 4.78 (1H, br. s, OH), 6.73 (2H, app. d, *J* 8.5 Hz, H-*o*-OArH), 7.00 (2H, app. d, *J* 8.5 Hz, *m*-OArH); <sup>13</sup>C NMR (d<sub>4</sub>-MeOD, 75.5 MHz): δ 9.2 (CH<sub>3</sub>), 30.4 (CH<sub>2</sub>), 37.8 (CH<sub>2</sub>), 56.8 (CH), 68.1 (CH<sub>2</sub>), 116.9 (CH), 127.8 (C), 132.0 (CH), 156.0 (C=O), 158.1 (C), 176.1(C=O); IR (KBr)  $\nu_{\max}$  (cm<sup>-1</sup>): 3331 (broad O-H), 1756 (C=O), 1709 (C=O); MS (CI<sup>+</sup>, NH<sub>3</sub>) *m/z* (%) 267 (52) [M+NH<sub>4</sub><sup>+</sup>], 91 (100); HRMS (ES<sup>+</sup>) for C<sub>13</sub>H<sub>15</sub>NO<sub>4</sub> [M+NH<sub>4</sub>]<sup>+</sup> Calc. 267.1339, Found 267.1343.

### Solid phase enolate alkylation reaction – optimised method for formation of (*S*, $\alpha$ *R*)-10a

Polymer (*S*)-6a (150 mg, 1.05 mmol $g^{-1}$ ) (sealed within an IRORI minikan<sup>TM</sup>) was preswelled in THF (8 mL) at 0 °C for 30 minutes under a nitrogen atmosphere. LHMDS (10 equiv., 1.0 M in THF) was then added dropwise and the reaction was stirred for 30 minutes at 0°C before the solvent and excess base were removed *via* cannula. The resin was then resuspended in fresh pre-chilled THF (10mL) at 0 °C under nitrogen, followed by dropwise addition of benzyl bromide (535 mg, 20 equiv.). The resultant suspension was stirred at 0 °C for 5 minutes then allowed to warm to room temperature over a period of 20 minutes. The reaction was quenched by addition of phosphate buffer solution (5 mL, pH 7), the IRORI minkan<sup>TM</sup> recovered and the resultant resin (*S*, $\alpha$ *R*)-10a washed thoroughly using CH<sub>2</sub>Cl<sub>2</sub> (10 mL), CH<sub>2</sub>Cl<sub>2</sub> /MeOH (10 mL) and THF (10 mL). TFA cleavage of 20 mg of the resultant resin (*S*, $\alpha$ *R*)-10a, followed by <sup>1</sup>H NMR spectroscopic analysis of the resultant cleavage products revealed the presence of (4*S*)-4-(4-hydroxybenzyl)-3-((2*R*)-2-methyl-3-phenylpropionyl)-oxazolidin-2-one 9a (75%, 97% de), (*S*)-HN-4-(4-hydroxybenzyl)-oxazolidin-2-one 4 (22%) and (*S*)-*N*-benzyl-4-(4-hydroxybenzyl)-oxazolidin-2-one 7 (3%).

### (4*S*)-4-(4-Hydroxy-benzyl)-3-((2*R*)-2-methyl-3-phenyl-propionyl)-oxazolidin-2-one 9a

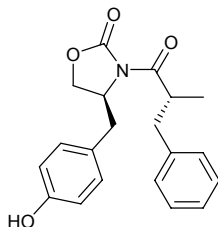

m. p. 142-143 °C;  $[\alpha]_D^{21} + 79$  (*c* 1.35, MeOH); <sup>1</sup>H NMR (CDCl<sub>3</sub>, 300 MHz):  $\delta$  1.10 (3H, d, *J* 7.0 Hz, CH<sub>3</sub>), 2.44 (1H, dd, *J* 13.5, 9.5 Hz, CH<sub>A</sub>H<sub>B</sub>Ar), 2.58 (1H, dd, *J* 13.0, 7.5 Hz, CH(CH<sub>3</sub>)H<sub>A</sub>H<sub>B</sub>), 2.83 (1H, dd, *J* 13.5, 3.5 Hz, CH<sub>A</sub>H<sub>B</sub>Ar), 3.06 (1H, dd, *J* 13.0, 7.0 Hz, CH(CH<sub>3</sub>)H<sub>A</sub>H<sub>B</sub>), 4.03 (3H, m, CH<sub>A</sub>H<sub>B</sub>O, CHCH<sub>3</sub>), 4.52 (1H, m, CHN), 5.83 (1H, br. s, OH), 6.65 (2H, app. d, *J* 8.5 Hz, *o*-OArH), 6.75 (2H, app. d, *J* 8.5 Hz, *m*-OArH), 7.06-7.19 (5H, br. m, ArH); <sup>13</sup>C NMR (CDCl<sub>3</sub>, 75.5 MHz):  $\delta$  17.3 (CH<sub>3</sub>), 37.1 (CH<sub>2</sub>), 40.1 (CH), 40.3 (CH<sub>2</sub>), 55.6 (CH), 66.5 (CH<sub>2</sub>), 116.3 (CH), 126.9 (C), 128.8 (CH), 129.6 (CH), 129.8 (CH), 131.0 (CH), 139.5 (C), 153.9 (C=O), 155.8 (C), 177.3 (C=O); IR (KBr)  $\nu_{max}$  (cm<sup>-1</sup>): 3345 (O-H), 1771 (C=O), 1719 (C=O); MS (CI<sup>+</sup>, NH<sub>3</sub>) *m/z* (%) 340 (100) [M+H<sup>+</sup>], 357 (98) [M+NH<sub>4</sub><sup>+</sup>]; HRMS (ES<sup>+</sup>) for C<sub>20</sub>H<sub>21</sub>NO<sub>4</sub> [M+H<sup>+</sup>] Calc. 340.1543, Found 340.1542.

### 3-Benzyl-4-(4S)-(4-hydroxy-benzyl)-oxazolidin-2-one 7

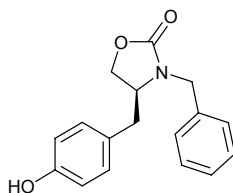

$[\alpha]_D^{21} + 14$  (*c* 0.7, EtOH);  $^1\text{H NMR}$  ( $\text{CDCl}_3$ , 300 MHz):  $\delta$  2.51 (1H, dd, *J* 13.5, 9.5 Hz,  $\text{CH}_\text{A}\text{H}_\text{B}\text{Ar}$ ), 2.92 (1H, dd, *J* 13.5, 3.5 Hz,  $\text{CH}_\text{A}\text{H}_\text{B}\text{Ar}$ ), 3.69 (1H, m, *CHN*), 3.94 (1H, dd, *J* 8.5, 6.0 Hz,  $\text{CH}_\text{A}\text{H}_\text{BO}$ ), 4.05 (2H, m,  $\text{CH}_\text{A}\text{H}_\text{BO}$ ,  $\text{NCH}_\text{A}\text{H}_\text{B}$ ), 4.80 (1H, d, *J* 15.0,  $\text{NCH}_\text{A}\text{H}_\text{B}$ ), 6.71 (2H, app. d, *J* 8.5 Hz, *o*-OArH), 6.82 (2H, app. d, *J* 8.5 Hz, *m*-OArH), 7.16 – 7.33 (5H, br. m, ArH);  $^{13}\text{C NMR}$  ( $\text{CDCl}_3$ , 75.5 MHz):  $\delta$  37.8 ( $\text{CH}_2$ ), 46.7 ( $\text{CH}_2$ ), 55.8 (CH), 67.5 ( $\text{CH}_2$ ), 116.3 (CH), 127.1 (C), 128.5 (CH), 128.6 (CH), 129.3 (CH), 130.5 (CH), 136.1 (C), 155.8 (C=O), 159.2 (C); IR (Thin film)  $\nu_{\text{max}}$  ( $\text{cm}^{-1}$ ): 3365 (broad O-H), 1742 (C=O); MS (CI<sup>+</sup>, NH<sub>3</sub>) *m/z* (%) 301 (100) [ $\text{M}+\text{NH}_4^+$ ], 284 (40) [ $\text{M}+\text{H}^+$ ]; HRMS (ES<sup>+</sup>) for C<sub>17</sub>H<sub>17</sub>NO<sub>3</sub> [ $\text{M}+\text{H}^+$ ] Calc. 284.1281, Found 284.1278.

### (*R*)-2-benzyl-propionic acid 11a

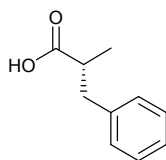

H<sub>2</sub>O<sub>2</sub> (50mg, 10 equiv.) was added to preswollen resin **10a** (130 mg) in THF (10 mL) at 0 °C, followed by dropwise addition of LiOH (16mg, 5 equiv.) in H<sub>2</sub>O (0.2 mL). The resultant suspension was shaken using an orbital shaker for 4 hours, then the resin filtered off and washed thoroughly with CH<sub>2</sub>Cl<sub>2</sub> (5 mL) and THF (5 mL). All washings were collected and evaporated to dryness, and the resultant cleavage products redissolved in EtOAc (10 mL) followed by H<sub>2</sub>O (10 mL). The aqueous layer was acidified to pH 1.0 using 2.0 N HCl (aq.), saturated with sodium chloride, before being extracted with EtOAc (10 mL). The combined organic fractions were then dried with MgSO<sub>4</sub>, filtered and solvent removed *in vacuo* to afford (*R*)-2-benzyl-propionic acid **11a** (16 mg, 0.1 mmol, 67% yield) and in 97% ee as determined by chiral HPLC analysis using a ChiralCel OJ column.

$^1\text{H NMR}$  ( $\text{CDCl}_3$ , 300 MHz):  $[\alpha]_D^{21} -25.0$  (*c* 1.0, CHCl<sub>3</sub>) (Lit.<sup>2</sup>  $[\alpha]_D^{21}$  for (*S*)-**11a** +20.6 (*c* 0.87, CHCl<sub>3</sub>));  $\delta$  1.15 (3H, d, *J* 7.0 Hz, CH<sub>3</sub>), 2.63 (1H, dd, *J* 13.5, 8.0 Hz,  $\text{CH}_\text{A}\text{H}_\text{B}\text{Ph}$ ), 2.73 (1H, m, CH), 3.05 (1H, dd, *J* 13.5, 8.0 Hz,  $\text{CH}_\text{A}\text{H}_\text{B}\text{Ph}$ ), 7.11-7.30 (5H, br. m, ArH);  $^{13}\text{C NMR}$  ( $\text{CDCl}_3$ , 75.5 MHz):  $\delta$  16.4 (CH<sub>3</sub>), 40.1 (CH<sub>2</sub>), 40.9 (CH), 126.3 (CH), 127.2 (CH), 128.8 (CH), 139.2 (C), 182.4 (C=O). Chiral HPLC conditions: ChiralCel

OJ column, 98% *n*-Hexane, 2 % isopropyl alcohol, 0.1% TFA, 1 ml/min. (*R*)-**11a**  $t_R$  9.5 min, (*S*)-**11a**  $t_R$  10.8 min.

## References

- (1) Faita, G.; Paio, A.; Quadrelli, P.; Rancati, F.; Seneci, P. *Tetrahedron*, **2001**, *57*, 8313.
- (2) Kotake, T.; Hayashi, Y; Rajesh, S.; Mukai, Y.; Takiguchi, Y.; Kimura, T.; Kiso, Y.; *Tetrahedron*, **2005**, *61*, 3819.
